# Supplementary material for: Polytypism and oxo-tungstate polyhedra polymerization in novel complex uranyl tungstates
Source: Royal Society of Chemistry journal article supplement (doi:10.1039/c2dt31000g), 2012-01-01
Supplement: c2dt31000g.pdf [file c2dt31000g.pdf]

## Supplementary Materials.

### Polytypism and oxo-tungsten polyhedra polymerization in novel complex uranyl tungstates

Andrey N. Seliverstov,<sup>a,b</sup> Evgeny V. Suleimanov,<sup>a</sup> Evgeny V. Chuprunov,<sup>a</sup> Nikolay V. Somov,<sup>a</sup>  
Elena M. Zhuchkova,<sup>a</sup> Maxim I. Lelet,<sup>a</sup> Konstantin B. Rozov,<sup>c</sup> Wulf Depmeier,<sup>d</sup> Sergey V.  
Krivovichev<sup>e</sup> and Evgeny V. Alekseev<sup>\*,c,f</sup>

---

<sup>a</sup> Lobachevsky State University of Nizhny Novgorod, Gagarin Av. 23b, 603950 Nizhny Novgorod, Russia.

<sup>b</sup> Anorganische Chemie II, Department Chemie und Pharmazie, Friedrich-Alexander-Universität Erlangen-Nürnberg, Egerlandstr. 1, D-91058 Erlangen, Germany.

<sup>c</sup> Institute of Energy and Climate Research (IEK-6), Forschungszentrum Jülich, D-52428 Jülich, Germany.

Fax: +49 2461 61 24 50 E-mail: [e.alekseev@fz-juelich.de](mailto:e.alekseev@fz-juelich.de)

<sup>d</sup> Institute für Geowissenschaften, University of Kiel, Ludewig-Meyn-Str. 10, D-24118 Kiel, Germany.

<sup>e</sup> Department of Crystallography, Saint Petersburg State University, Dekabristov 16, 199155 Sankt Petersburg, Russia.

<sup>f</sup> Institute für Kristallographie, RWTH Aachen University, Jägerstraße 17 – 19 D-52066 Aachen, Germany.

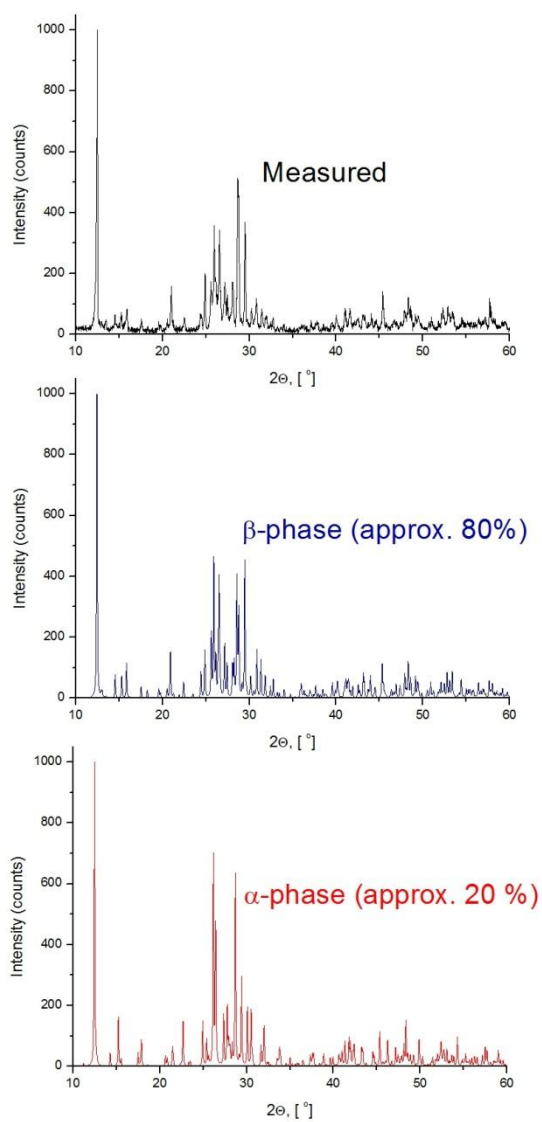

Figure 1 . Theoretical PXRD of 1(red) and 2(blue) and experimental pattern measured from their mixture.

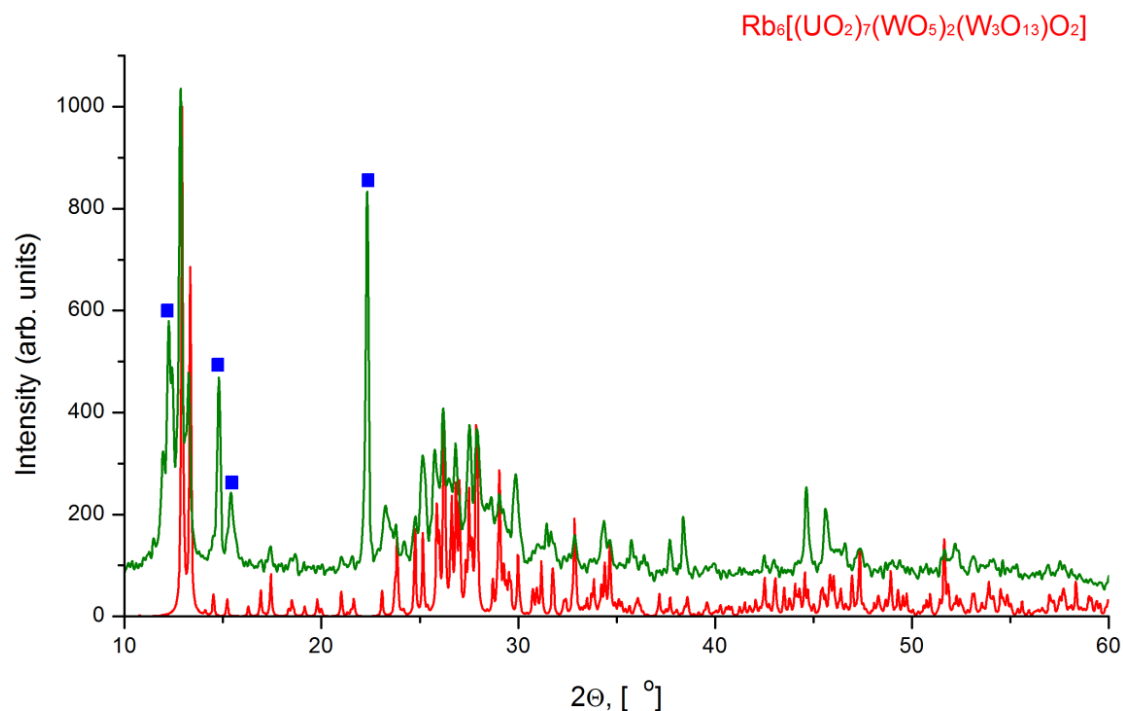

Figure 2. Theoretical (red) and measured (green) pattern of 3. The peaks of impurities are shown by blue boxes. The impurities are mostly presented by  $\text{R}_2\text{U}_2\text{O}_7$ ,  $\text{Rb}_2\text{W}_2\text{O}_7$  and  $\text{UO}_2\text{WO}_4$ .

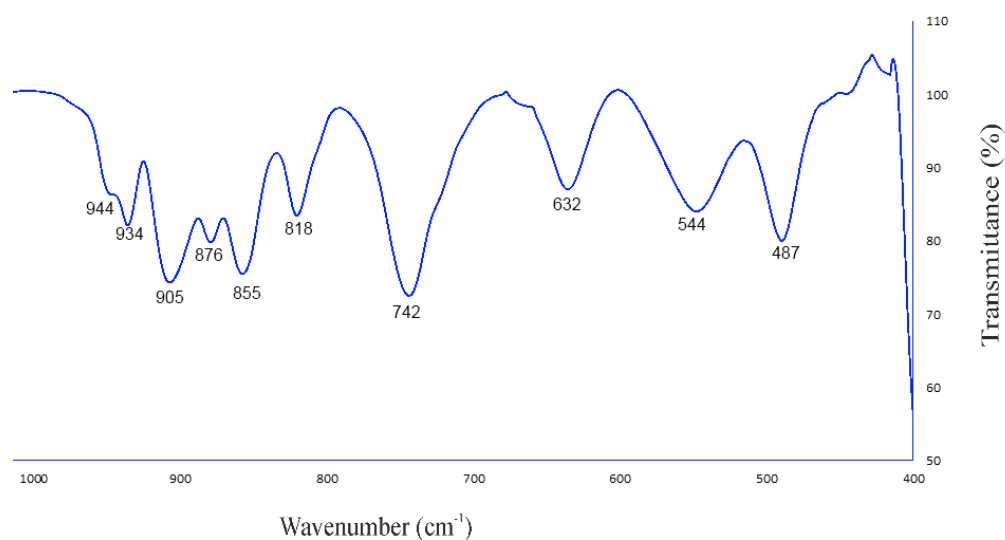

Figure 3. The IR spectra collected from mixture of 1 and 2. The phases are based on identical molecular fragments. The following bands assignment can be given:  $944\text{ cm}^{-1}$  and  $934\text{ cm}^{-1}$  are absorption bands of short tungstoyl groups ( $\text{W}=\text{O}$ );  $905\text{ cm}^{-1}$  and  $818\text{ cm}^{-1}$  are  $\nu_3$  and  $\nu_1$  modes of  $\text{UO}_2^{2+}$  group;  $876\text{ cm}^{-1}$ ,  $855\text{ cm}^{-1}$  and  $818\text{ cm}^{-1}$  are absorption bands of  $\text{W}-\text{O}$  bonds in trigonal bipyramids  $\text{WO}_5$ ; the bands at  $632\text{ cm}^{-1}$ ,  $544\text{ cm}^{-1}$  and  $487\text{ cm}^{-1}$  are vibrations of  $\text{W}-\text{O}-\text{U}$  bonds.
